# Supplementary material for: Effects of intramuscular fat on meat quality and its regulation mechanism in Tan sheep
Source: PubMed Central journal article supplement (PMC9366309; doi:10.3389/fnut.2022.908355), 2022-07-28

**Supplementary Figure S1** The outlier sample determined by PCA scaling plots.

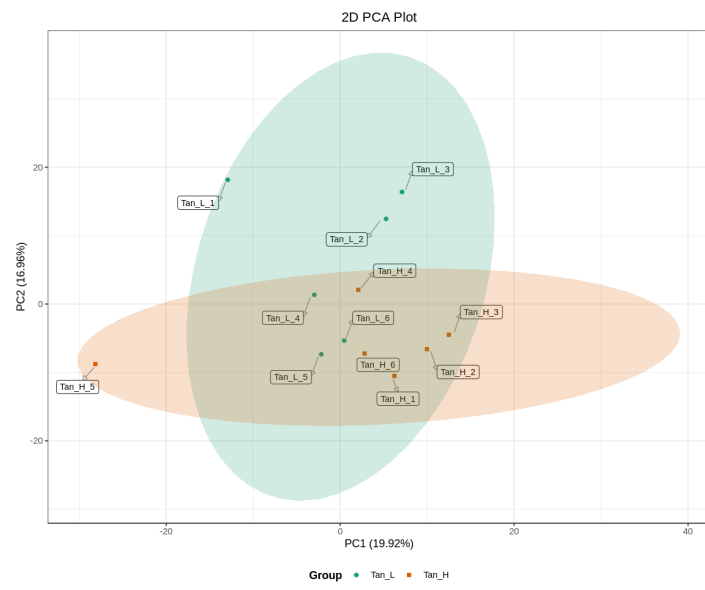

**Supplementary Figure S2** Pearson correlation between samples used in RNA-Seq.

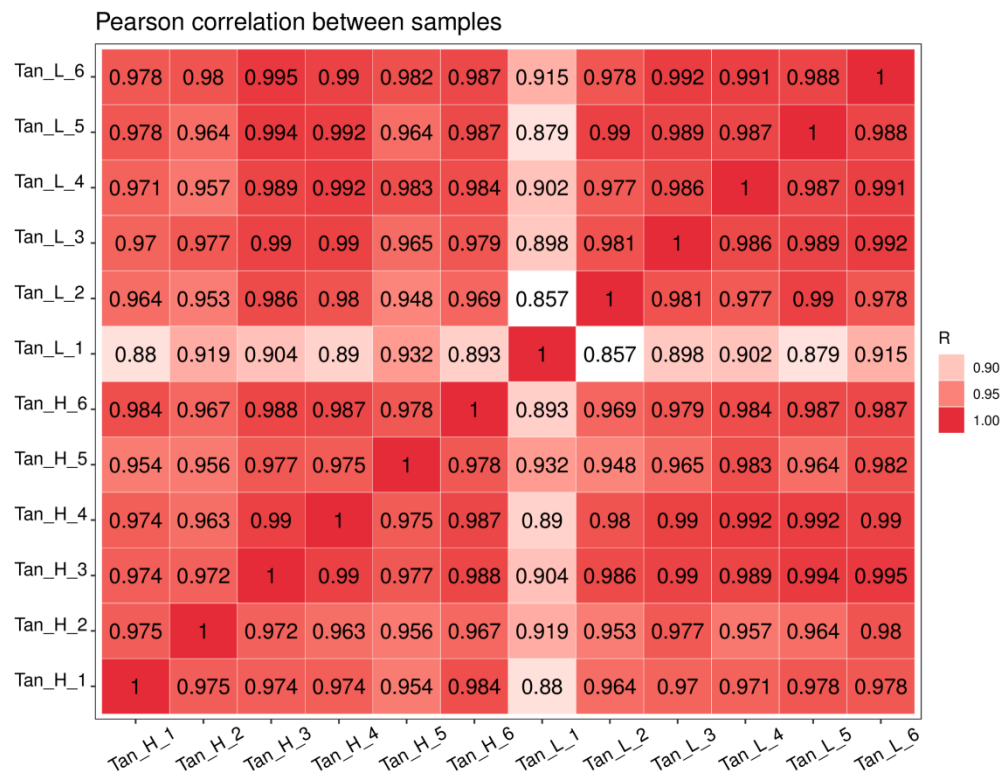

Supplementary Figure S3 KEGG enrichment analysis of differentially expressed genes.

### KEGG Enrichment Bar Plot

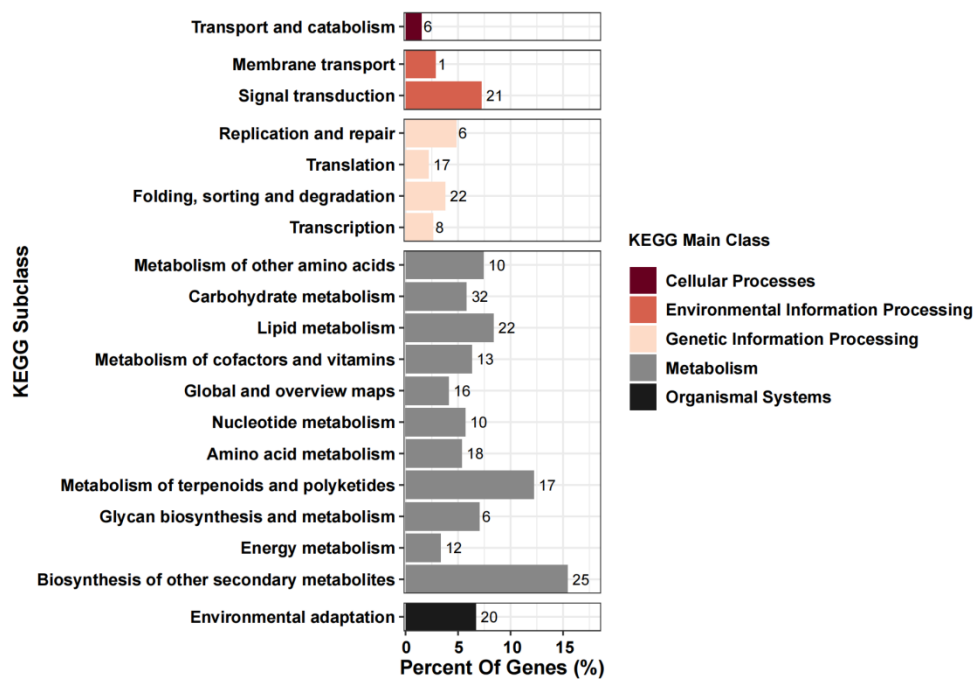

Supplement: Presentation_1.pdf [file Presentation_1.pdf]
